# Supplementary material for: The use of virtual reality in studying prejudice and its reduction: A systematic review
Source: PubMed Central journal article supplement (PMC9282653; doi:10.1371/journal.pone.0270748), 2022-07-14
Supplement: pone.0270748.s003.pdf [file pone.0270748.s003.pdf]

# The use of virtual reality in studying prejudice and its reduction: a systematic review – Database search strategy

Controlled vocabulary terms have been used for database searches. We selected the search terms through the *PsycINFO Thesaurus of Psychological Index Terms*.

The terms selection process initially resulted in 14 controlled vocabulary terms, of which 7 are related to virtual reality, and the remaining 7 to intergroup attitudes.

The searches were re-run with updated terms on 10.01.2022 following reviewers' comments. We removed duplicates between the old and new search using the method proposed by Bramer & Bain (2017) <https://www.ncbi.nlm.nih.gov/pmc/articles/PMC5490709/> which resulted in 1873 additional hits from the 2021 search to the 2022 search.

Below are listed the database-specific strings used and the dates of entry.

## Web of Science

*search string 1 (searched 07/01/2021):*

((TS = ((Vr OR virtual reality OR immersive virtual environment OR simulation-based assessment OR virtual reality exposure therapy OR virtual OR augmented reality) AND (intergroup relations OR ingroup outgroup OR prejudice OR discriminat\* OR bias OR stereotyp\* OR stigma\*)))

6356 citations retrieved.

*search string 2 searched (10/01/2022):*

((TS = ((Vr OR virtual reality OR immersive virtual environment OR simulation-based assessment OR virtual reality exposure therapy OR virtual OR augmented reality)

AND

(intergroup relations OR ingroup outgroup OR prejudice OR discriminat\* OR bias OR stereotyp\* OR stigma\* OR intergroup attitude\* OR outgroup attitude\*))

)))

7380 citations retrieved.

## Scopus

*search string 1 (searched 07/01/2021):*

TITLE-ABS-KEY ( ( vr OR "virtual reality" OR "immersive virtual environment" OR "simulation-based assessment" OR "virtual reality exposure therapy" OR virtual OR "augmented reality" ) AND ( "intergroup relations" OR "ingroup outgroup" OR prejudice OR discriminat\* OR bias OR stereotyp\* OR stigma\* ) ) AND ( LIMIT-TO ( LANGUAGE , "English" ) OR LIMIT-TO ( LANGUAGE , "German" ) OR LIMIT-TO ( LANGUAGE , "Italian" ) )

7070 citations retrieved.

*search string 2 searched (10/01/2022):*

TITLE-ABS-KEY ( ( vr OR "virtual reality" OR "immersive virtual environment" OR "simulation-based assessment" OR "virtual reality exposure therapy" OR virtual OR "augmented reality" ) AND ( "intergroup relations" OR "ingroup outgroup" OR prejudice OR discriminat\* OR bias OR stereotyp\* OR stigma\* OR "intergroup attitude\*" OR "outgroup attitude\*" ) ) AND ( LIMIT-TO ( LANGUAGE , "English" ) OR LIMIT-TO ( LANGUAGE , "German" ) OR LIMIT-TO ( LANGUAGE , "Italian" ) )

8027 citations retrieved.

## **Psycinfo**

*search string 1 (searched 07/01/2021):*

((Vr or "virtual reality" or "immersive virtual environment" or "simulation-based assessment" or "virtual reality exposure therapy" or virtual or "augmented reality") and ("intergroup relations" or "ingroup outgroup" or prejudice or discriminat\* or bias or stereotyp\* or stigm\*)).mp. [mp=title, abstract, heading word, table of contents, key concepts, original title, tests & measures, mesh]

1376 citations retrieved.

*search string 2 searched (10/01/2022):*

((Vr or "virtual reality" or "immersive virtual environment" or "simulation-based assessment" or "virtual reality exposure therapy" or virtual or "augmented reality") and ("intergroup relations" or "ingroup outgroup" or prejudice or discriminat\* or bias or stereotyp\* or stigm\* or "intergroup attitude\*" or "outgroup attitude\*")).mp. [mp=title, abstract, heading word, table of contents, key concepts, original title, tests & measures, mesh word]

1559 citations retrieved.
